# Supplementary material for: ABTS On-Line Antioxidant, α-Amylase, α-Glucosidase, Pancreatic Lipase, Acetyl- and Butyrylcholinesterase Inhibition Activity of Chaenomeles Fruits Determined by Polyphenols and other Chemical Compounds
Source: MDPI journal article supplement (doi:10.3390/antiox9010060), 2020-01-09
Supplement: s1 [file s1]

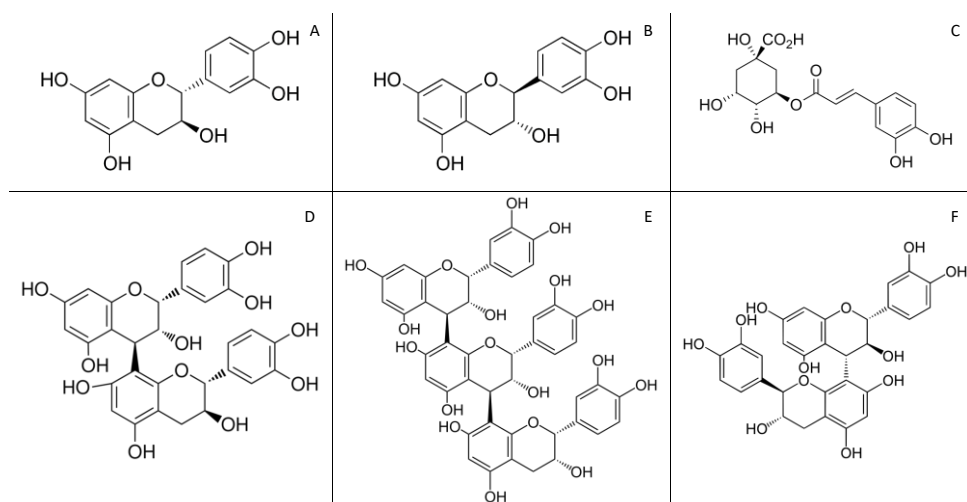

**Figure S1.** Structural formulas of selected phenolic compounds identified in *Chaenomeles* fruits: A-(+)-Catechin, B-(-)-Epicatechin, C-5-O-Caffeoylquinic acid (chlorogenic), D-Procyanidin B2, E-Procyanidin C1, F-Procyanidin B3
